# Supplementary material for: TGF-β activation by bone marrow-derived thrombospondin-1 causes Schistosoma- and hypoxia-induced pulmonary hypertension
Source: PubMed Central journal article supplement (PMC5459967; doi:10.1038/ncomms15494), 2017-05-30
Supplement: ncomms15494-s1.pdf [file ncomms15494-s1.pdf]

**Supplementary Table 1:** Left ventricular systolic pressure (LVSP), right and left ventricular diastolic pressures (RVDP/LVDP), heart rate (HR), and body weight (Bd. wt.) of IP/IV exposed and unexposed wildtype mice treated with either SLLK or LSKL peptide (mean  $\pm$  SD; n=6, 5, 6 and 11 mice / group, respectively; ANOVA  $P$ =NS, non significant; IP/IV, Intraperitoneal/intravenous *S. mansoni* eggs.).

| Wildtype on Peptide | Experimental conditions | LVSP (mmHg)    | RVDP (mmHg)   | LVDP (mmHg)   | HR (bpm)         | Bd. wt. (g)    |
|---------------------|-------------------------|----------------|---------------|---------------|------------------|----------------|
| SLLK                | Unexposed               | 51.7 $\pm$ 4.3 | 1.2 $\pm$ 0.6 | 2.6 $\pm$ 0.6 | 172.2 $\pm$ 33.7 | 19.0 $\pm$ 1.8 |
| SLLK                | IP/IV eggs              | 55.7 $\pm$ 3.9 | 1.5 $\pm$ 0.4 | 3.2 $\pm$ 0.5 | 177.0 $\pm$ 12.5 | 20.3 $\pm$ 0.9 |
| LSKL                | Unexposed               | 56.4 $\pm$ 6.9 | 1.3 $\pm$ 0.5 | 2.6 $\pm$ 0.8 | 170.2 $\pm$ 21.7 | 19.9 $\pm$ 0.9 |
| LSKL                | IP/IV eggs              | 57.1 $\pm$ 4.2 | 1.8 $\pm$ 0.6 | 3.2 $\pm$ 0.5 | 160.1 $\pm$ 26.2 | 20.6 $\pm$ 1.2 |
| ANOVA               |                         | NS             | NS            | NS            | NS               | NS             |

**Supplementary Table 2:** Left ventricular systolic pressure (LVSP), right and left ventricular diastolic pressures (RVDP/LVDP), heart rate (HR), and body weight (Bd. wt.) of IP/IV exposed and unexposed wildtype (WT) mice recipient of either wildtype or *Thbss1* bone marrow (BM) (mean  $\pm$  SD; n=10, 7 and 7 mice / group, respectively; ANOVA  $P$ =NS, non significant; IP/IV, Intraperitoneal/intravenous *S. mansoni* eggs.).

| BM Recipient | BM Donor                    | Experimental conditions | LVSP (mmHg)     | RVDP (mmHg)   | LVDP (mmHg)   | HR (bpm)         | Bd. wt. (g)    |
|--------------|-----------------------------|-------------------------|-----------------|---------------|---------------|------------------|----------------|
| WT           | <i>Thbs1</i> <sup>-/-</sup> | Unexposed               | 62.6 $\pm$ 15.2 | 1.5 $\pm$ 0.4 | 2.1 $\pm$ 0.9 | 152 $\pm$ 19.8   | 20.1 $\pm$ 1.4 |
| WT           | <i>Thbs1</i> <sup>-/-</sup> | IP/IV eggs              | 63.1 $\pm$ 27.9 | 1.6 $\pm$ 0.6 | 2.1 $\pm$ 0.7 | 162.3 $\pm$ 26.0 | 20.1 $\pm$ 1.4 |
| WT           | WT                          | IP/IV eggs              | 73.6 $\pm$ 10.5 | 1.2 $\pm$ 0.7 | 1.5 $\pm$ 0.7 | 188.7 $\pm$ 75.3 | 19.0 $\pm$ 1.8 |
| ANOVA        |                             |                         | NS              | NS            | NS            | NS               | NS             |

**Supplementary Table 3:** Left ventricular systolic pressure (LVSP), right and left ventricular diastolic pressures (RVDP/LVDP), heart rate (HR), and body weight (Bd. wt.) of chronic hypoxia (Ch. Hx) exposed and normoxic wildtype mice treated with either SLLK or LSKL peptide (mean  $\pm$  SD; n=6 mice / group; t test,  $P$ =NS, non significant).

| <b>Wildtype on Peptide</b> | <b>Experimental conditions</b> | <b>LVSP (mmHg)</b> | <b>RVDP (mmHg)</b> | <b>LVDP (mmHg)</b> | <b>HR (bpm)</b>  | <b>Bd. wt. (g)</b> |
|----------------------------|--------------------------------|--------------------|--------------------|--------------------|------------------|--------------------|
| SLLK                       | Ch. Hx                         | 74.9 $\pm$ 5.4     | 1.7 $\pm$ 0.8      | 2.3 $\pm$ 0.9      | 272.2 $\pm$ 62.7 | 17.6 $\pm$ 0.9     |
| LSKL                       | Ch. Hx                         | 76.5 $\pm$ 6.6     | 2.4 $\pm$ 0.6      | 2.7 $\pm$ 1.1      | 264.0 $\pm$ 79.3 | 17.2 $\pm$ 1.8     |
| t-test                     |                                | NS                 | NS                 | NS                 | NS               | NS                 |

**Supplementary Table 4:** Demographic and clinical characteristics of human scleroderma subjects, before and after diagnosis with pulmonary arterial hypertension. NHW, Non-Hispanic White; mPAP, mean Pulmonary Arterial Pressure; PVR, Pulmonary Vascular Resistance; TDCO, Thermodilution Cardiac Output; TDCI, Thermodilution Cardiac Index; RAP, Right Arterial Pressure; FVC, Forced Vital Capacity; FEV<sub>1</sub>, Forced Expiratory Volume in One Second; DLCO, Diffusing Capacity of the Lungs for Carbon Monoxide; 6MWT, 6 Minute Walk Test; NYHA, New York Heart Association; ND: not done (mean ± SD; number of samples with data available presented).

| Parameters                                  | SSc Pre-PAH  | SSc Post-PAH |
|---------------------------------------------|--------------|--------------|
| N                                           |              | 7            |
| Age                                         | 53.4±8.8     | 58.3±8.8     |
| Gender                                      |              | 71% F        |
| Race/Ethnicity                              |              | 71% NHW      |
| mPAP (mmHg)                                 | 20.0, 1      | 34.6±11.2, 7 |
| PVR (Wood Units)                            | 3.1, 1       | 5.4±3.3, 7   |
| TDCO (L min <sup>-1</sup> )                 | 4.6, 1       | 4.6±0.6, 7   |
| TDCI (L min <sup>-1</sup> m <sup>-2</sup> ) | 2.5, 1       | 2.7±0.2, 7   |
| RAP (mmHg)                                  | 1.0, 1       | 6.0±3.9, 7   |
| RVSP on Echo (mmHg)                         | 31.8±8.0, 5  | 69.4±19.7, 7 |
| FVC (% Predicted)                           | 85.6±7.7, 5  | 77.2±13.3, 6 |
| FEV1 (% Predicted)                          | 81.0±8.0, 5  | 74.2±9.8, 6  |
| DLCO (% Predicted)                          | 61.8±22.9, 4 | 33.8±9.2, 6  |
| 6MWT                                        | 180, 1       | 268±87, 4    |
| NYHA Functional Class                       | ND           | 2.3±0.5, 4   |

**Supplementary Table 5:** Reagents for quantifying mouse protein by ELISA.

| <b>Protein</b> | <b>Kit</b>                 |
|----------------|----------------------------|
| TSP-1          | Cloud-Clone Corp. SEA611Mu |
| IL-4           | R&D Systems M4000B         |
| IL-13          | R&D Systems M1300CB        |
| CCR2           | LSBio LS-F19718            |
| CCL2           | R&D Systems MJE00          |
| CCL7           | MYBioSource MBS764604      |
| CCL12          | R&D Systems MCC120         |

**Supplementary Table 6:** Reagents for immunostaining mouse tissue. All rinses between steps in TBST.

| <b>Immunostain</b>     | <b>Antigen Retrieval</b>                                | <b>Block</b>                                                                                         | <b>Primary Antibody</b>                              | <b>Secondary Antibody</b>                                                                                      | <b>Tertiary Reagent</b>               |                                                             |
|------------------------|---------------------------------------------------------|------------------------------------------------------------------------------------------------------|------------------------------------------------------|----------------------------------------------------------------------------------------------------------------|---------------------------------------|-------------------------------------------------------------|
| αSM-actin              | Borg Buffer<br>20 min in steamer<br>(Biocare #BD1000G1) | Avidin 10 min, Biotin 10 min, Mouse on Mouse (MOM) kit blocking solution (Vector BMK-2202) 1hr at RT | 1:200 (0.355 µg/ml) 30min at RT (Dako #M0851)        | MOM Biotinylated anti-Mouse Reagent (Vector BMK-2202) 10min at RT, then 1:500 SA-Fluorescein (Invitrogen S869) | Vectashield with DAPI (Vector H-1500) |                                                             |
| TSP-1                  |                                                         |                                                                                                      | 1:50 (2 µg/ml) 1hr at RT (abcam ab1823)              |                                                                                                                |                                       |                                                             |
| Mac3                   |                                                         | 10% Rabbit Serum in 1:1 5% BSA: Superblock (ScyTek AAA5000) 1hr at RT                                | 1:50 (0.625 µg/ml) 1hr at RT (BD Pharmingen #550292) |                                                                                                                |                                       | 1:200 AF594 Rabbit anti-Rat (Invitrogen #A21211) 1hr at RT  |
| Thrombomodulin (CD141) |                                                         | 10% Horse Serum in 1:1 5% BSA: Superblock 1hr at RT                                                  | 1:200 (1 µg/ml) 1hr at RT (R&D Systems #AF3894)      |                                                                                                                |                                       | 1:200 AF594 Donkey anti-Goat (Invitrogen #A11058) 1hr at RT |

**Supplementary Table 7: Antibodies used in the flow cytometry experiment.**

| <b>Antibody Specificity</b>       | <b>Fluochrome</b> | <b>Isotype</b> | <b>Clone</b> | <b>Final Concentration</b>  | <b>Manufacturer</b> |
|-----------------------------------|-------------------|----------------|--------------|-----------------------------|---------------------|
| Anti-mouse TSP-1                  | PE                | IgG2a Kappa    | TX17.10      | 0.2µg/10 <sup>6</sup> cells | Novus               |
| Anti-mouse CD64                   | BV711             | Mouse IgG1, κ  | X54-5/7.1    | 0.1µg/10 <sup>6</sup> cells | Biolegend           |
| Mouse MerTK Biotinylated Antibody | Biotin-PE-Cy7     | IgG            | -            | 1µg/10 <sup>6</sup> cells   | R&D Systems         |
| Anti-mouse/Rat CD11b              | AF700             | IgG2b, kappa   | M1/70        | 0.1µg/10 <sup>6</sup> cells | eBioscience®        |
| Anti-mouse CD11c                  | PerCp Cy5.5       | IgG            | N418         | 0.1µg/10 <sup>6</sup> cells | eBioscience®        |
| Anti-mouse Ly6C                   | APC               | IgG2c, kappa   | HK1.4        | 0.1µg/10 <sup>6</sup> cells | eBioscience®        |

**Supplementary Table 8:** Reagents for immunostaining human tissue. All rinses between steps in PBS.

| <b>Immuno-stain</b> | <b>Antigen Retrieval</b>                                | <b>Block</b>                        | <b>Primary Antibody</b>                                               | <b>Secondary Antibody</b>                                           | <b>Tertiary Reagent</b>                  |
|---------------------|---------------------------------------------------------|-------------------------------------|-----------------------------------------------------------------------|---------------------------------------------------------------------|------------------------------------------|
| CD68                | Borg Buffer<br>20 min in steamer<br>(Biocare #BD1000G1) | 10% Horse Serum in PBS<br>1hr at RT | 1:100 (0.2 µg/ml) in PBS<br>O/N at 4degC<br>(ThermoFisher #PA5-32331) | 1:200 AF594 Donkey anti-Rabbit<br>(Invitrogen #A21207)<br>1hr at RT | Vectashield with DAPI<br>(Vector H-1500) |
| vWF                 |                                                         |                                     | 1:8,000 (0.388 µg/ml) in PBS<br>O/N at 4degC<br>(Dako #A0082)         |                                                                     |                                          |
| TSP-1               |                                                         |                                     | 1:50 (2 µg/ml) in PBS<br>O/N at 4degC (abcam ab1823)                  | 1:200 AF488 Donkey anti-Mouse<br>(Invitrogen #A21202)<br>1hr at RT  |                                          |

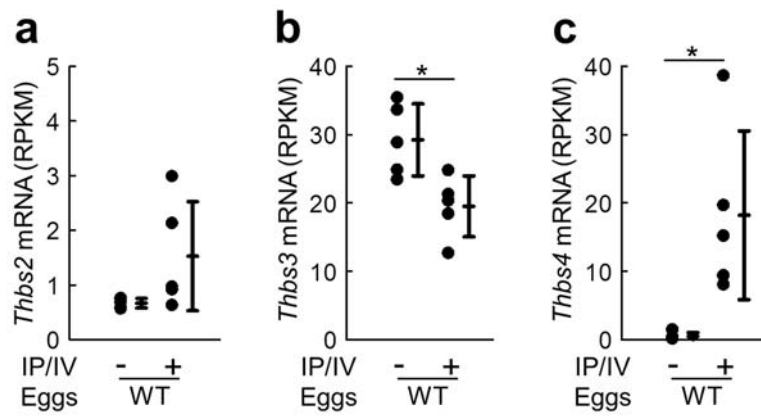

**Supplementary Figure 1. mRNA quantity of other thrombospondin isoforms.** Whole lung concentrations of *Thbs2*, *Thbs3* and *Thbs4* mRNA by RNA-seq (n=5 mice / group; mean  $\pm$  SD plotted; RPKM: reads per kilobase per million mapped reads; t-test; \* $P < 0.05$ ) in mice unexposed or with *Schistosoma*-induced PH. IP/IV=intraperitoneal and intravenous *S. mansoni* eggs.



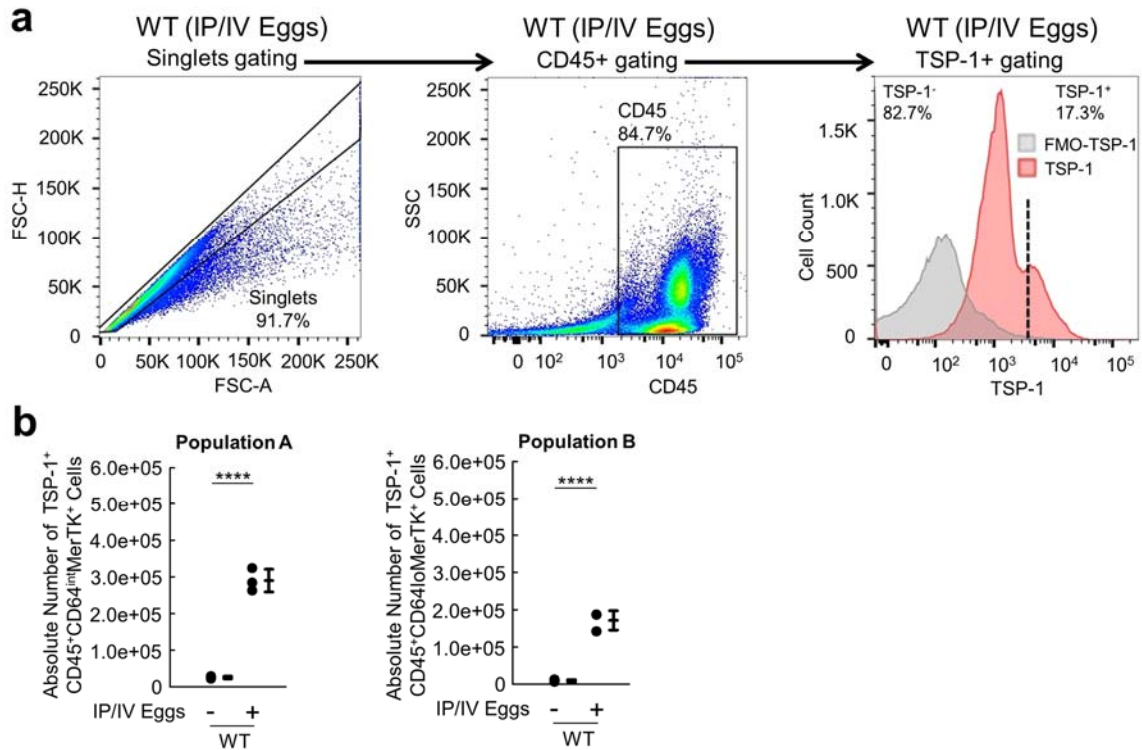

**Supplementary Figure 2. Schematic representation of flow cytometry analysis of TSP-1<sup>+</sup> cells in *Schistosoma*-exposed mice.** (a) Gating strategy for flow cytometry: singlets were gated for CD45<sup>+</sup> cells, followed by identifying the TSP-1+ gate (threshold determined by FMO for each sample; representative image of 3 / group). (b) Absolute numbers of the A and B populations from Figure 1c (n=3 / group; mean ± SD plotted; t-test, \*\*\*\* $P < 0.001$ ). FSC, forward scatter; SSC, side scatter; IP/IV=intraperitoneal and intravenous *S. mansoni* eggs.

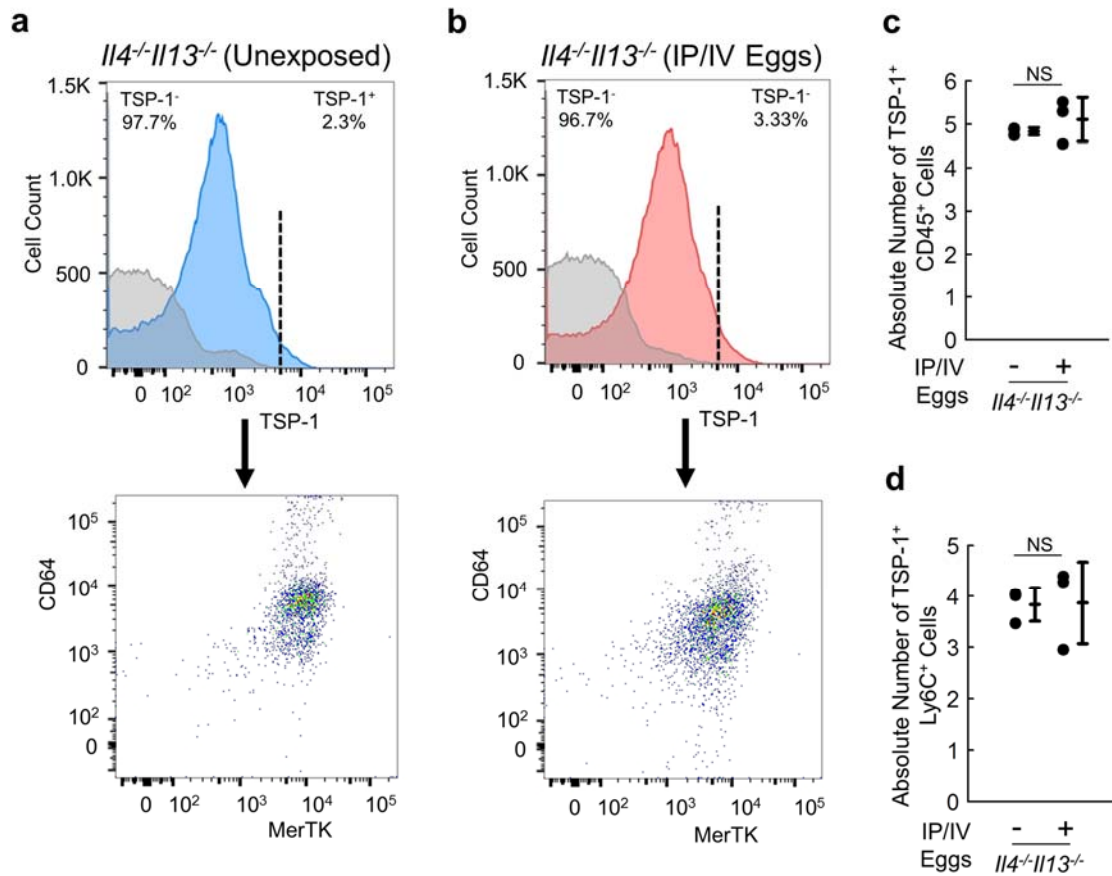

**Supplementary Figure 3. Flow cytometry analysis in unexposed and *Schistosoma*-exposed *I14<sup>-/-</sup>I113<sup>-/-</sup>* mice.** Representative histograms from cell-dispersed whole lung tissue, which stain positive for intracellular TSP-1 by flow cytometry from (a) unexposed or (b) *Schistosoma*-exposed *I14<sup>-/-</sup>I113<sup>-/-</sup>* mice. Log transformed (c) absolute number of CD45<sup>+</sup>TSP-1<sup>+</sup> populations and (d) absolute number of CD45<sup>+</sup>Ly6C<sup>+</sup> populations (n=3 / group; mean ± SD plotted, t test, NS=non-significant; IP/IV = intraperitoneal and intravenous *S. mansoni* eggs).

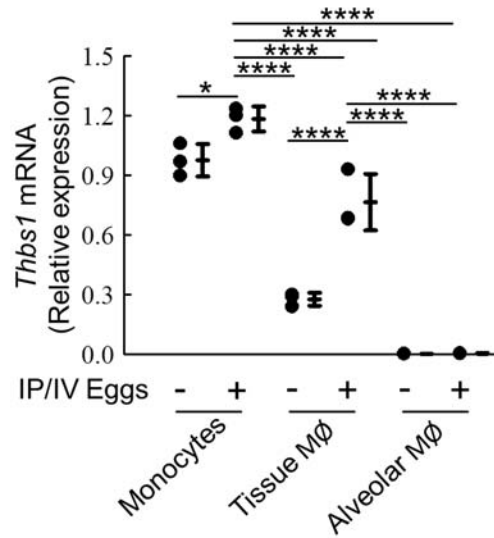

**Supplementary Figure 4. *Thbs1* mRNA in sorted Ly6C<sup>+</sup> monocytes, tissue macrophages (MØ), and alveolar macrophages (MØ).** *Thbs1* mRNA transcript in sorted cells from unexposed or *Schistosoma*-exposed digested mouse lungs. The sorted cell populations for monocytes are as shown in Figure 1c, tissue MØ are CD11b<sup>+</sup>CD11c<sup>-</sup>, and alveolar MØ are CD11c<sup>+</sup>SiglecF<sup>+</sup>, respectively. (Pooled mRNA from n=3 mice / group; mean of 3 technical replicates per group shown;  $2^{-\Delta Ct}$  relative to *HPRT* housekeeping gene; mean  $\pm$  SD plotted; t-test; \* $P < 0.05$ , \*\*\*\* $P < 0.001$ ). IP/IV=intraperitoneal and intravenous *S. mansoni* eggs.

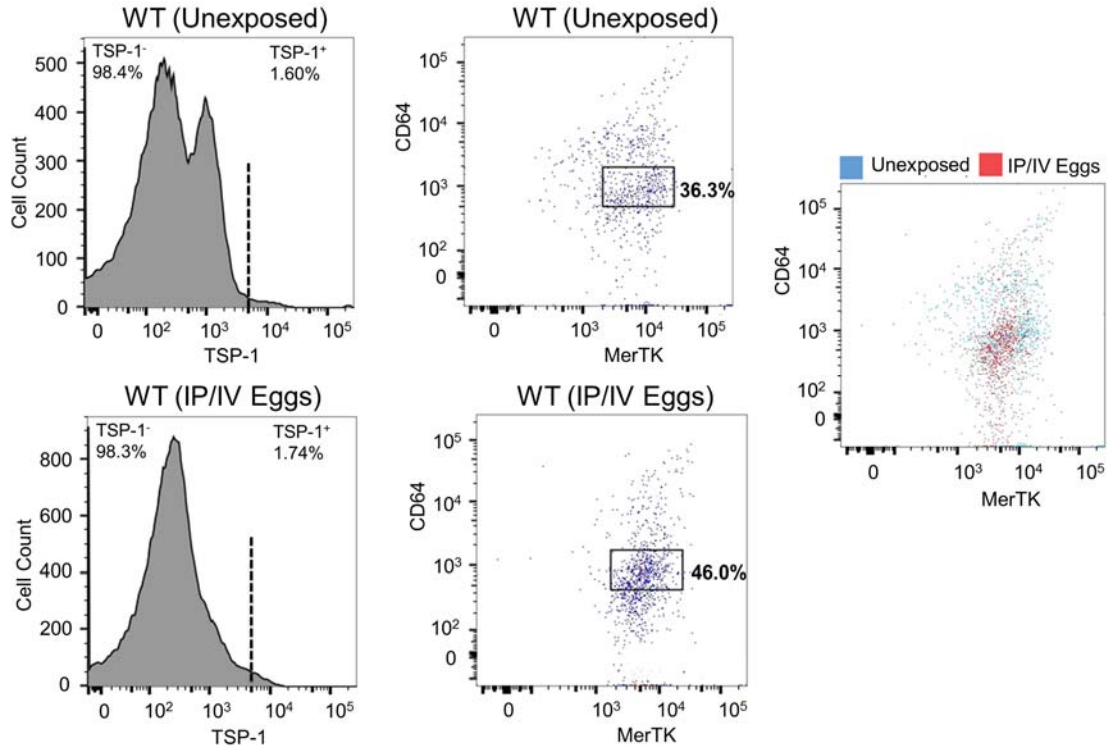

**Supplementary Figure 5. Flow cytometry analysis of extracellular TSP-1 staining in *Schistosoma* exposed mice.** Flow cytometry of cells from cell-dispersed whole lung tissue with extracellular-only staining of TSP-1, followed by the same gating strategy as in Figures 1B and C, in *Schistosoma* exposed and unexposed wildtype mice. Flow studies representative of at least 3 experiments / group; IP/IV=intraperitoneal and intravenous *S. mansoni* eggs.

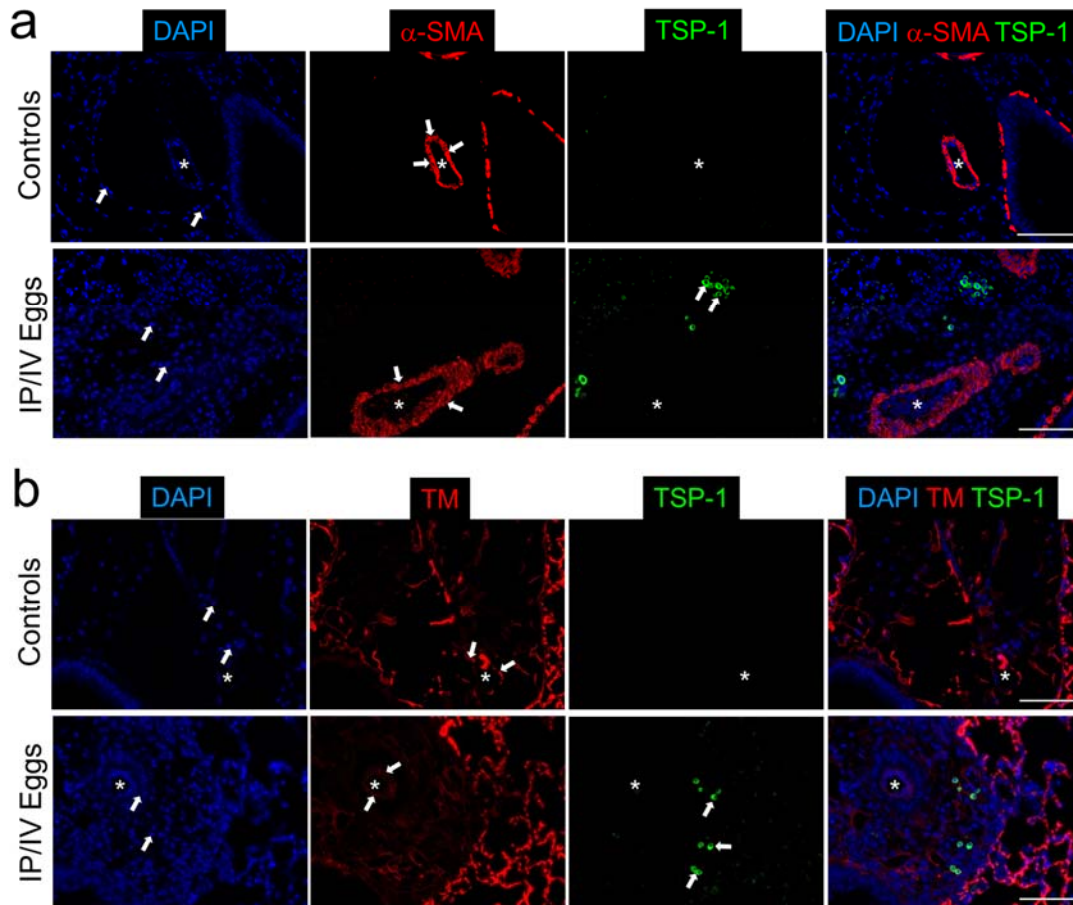

**Supplementary Figure 6. No evidence of TSP-1 colocalization with the pulmonary vascular media or intima in *Schistosoma* egg unexposed and exposed wildtype mice. (a) Co-staining for  $\alpha$ -SMA (smooth muscle cell marker) and TSP-1 in *Schistosoma* eggs unexposed and exposed wildtype mice. (b) Co-staining for TM (endothelial cell marker) and TSP-1 in *Schistosoma* eggs unexposed and exposed wildtype mice (arrows show areas of either DAPI, SMA, TM or TSP-1<sup>+</sup> staining). DAPI, 4',6-diamidino-2-phenylindole, SMA, smooth muscle actin; TM, thrombomodulin (\*: vessel lumen; all scale bars 100 $\mu$ m.). IP/IV= intraperitoneal and intravenous *S. mansoni* eggs.**

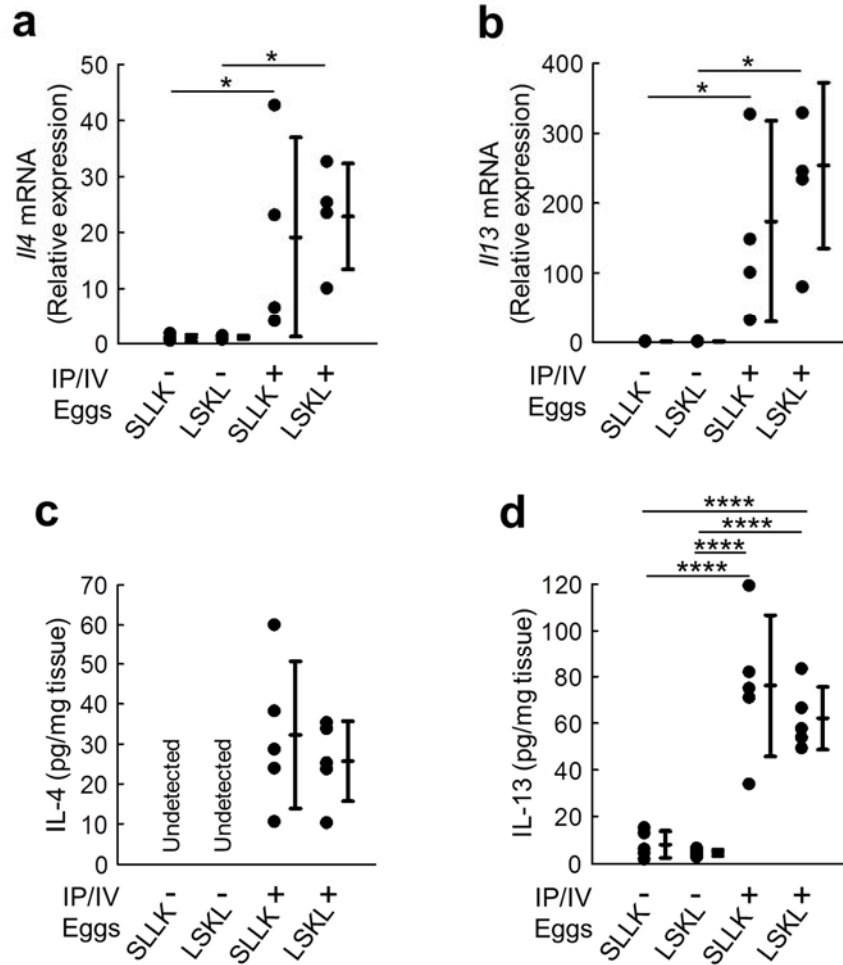

**Supplementary Figure 7. IL-4 and IL-13 levels are unchanged in TSP-1 blockade.**

mRNA level of (a) *I/4* (n=4 / group) and (b) *I/13* (n=3, 3, 4, 4 / group, respectively); and protein levels of (c) IL-4 (n=5 / group) and (d) IL-13 (n=5 / group) in whole lung lysates of SLLK or LSKL treated mice, either unexposed or exposed to IP/IV eggs (mean ± SD plotted, mRNA quantified by RT-PCR;  $2^{-\Delta Ct}$  relative to the geometric mean of  $\beta$ -actin and *Gapdh* housekeeping genes; normalized to mean of SLLK unexposed group = 1; ANOVA  $P < 0.05$ , each, with *post-hoc* Tukey tests shown). IP/IV=intraperitoneal and intravenous *S. mansoni* eggs.

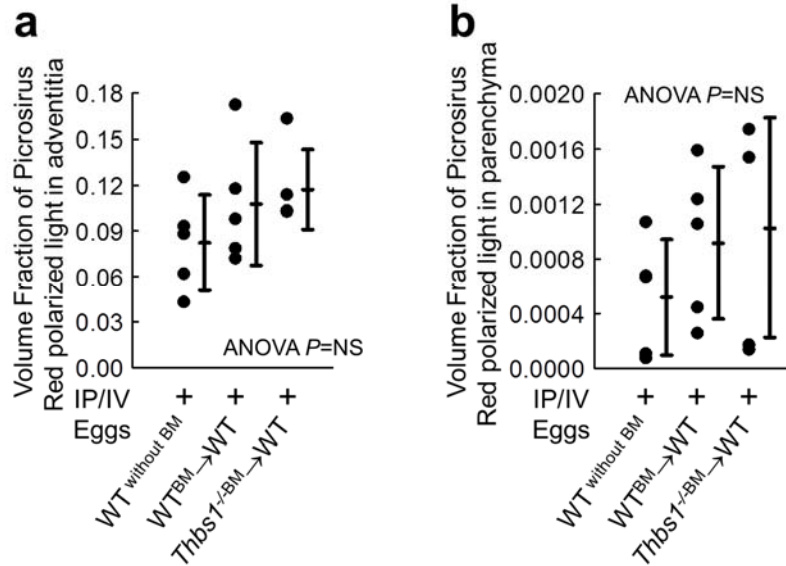

**Supplementary Figure 8. No evidence of perivascular and parenchymal fibrosis in irradiated mice followed by bone marrow (BM) transplant.** Quantitative analysis using picrosirius red staining showed no difference in the volume fraction of (a) vascular adventitia and (b) parenchyma, which contains polarized material (i.e., Type 1 collagen) among wildtype mice without BM transplant, or receiving BM from WT or *Thbs1*<sup>-/-</sup> mice. (n=5/group; mean ± SD plotted; ANOVA *P* value: NS, non-significant). IP/IV=intraperitoneal and intravenous *S. mansoni* eggs.

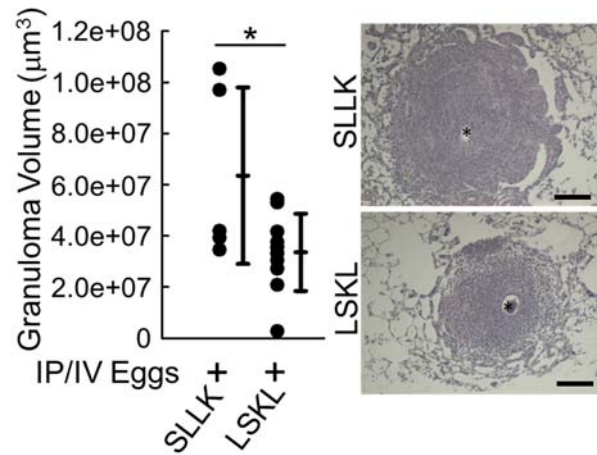

**Supplementary Figure 9. Granuloma volumes following TSP-1 blockade.** LSKL or SLLK treatment of wildtype, following IP/IV egg-exposure (n=5 and 10 mice / group, respectively; mean  $\pm$  SD plotted; t-test; \* $P$ <0.05, \*: vessel lumen; scale bars: 100 $\mu\text{m}$ ). IP/IV=intraperitoneal and intravenous *S. mansoni* eggs.



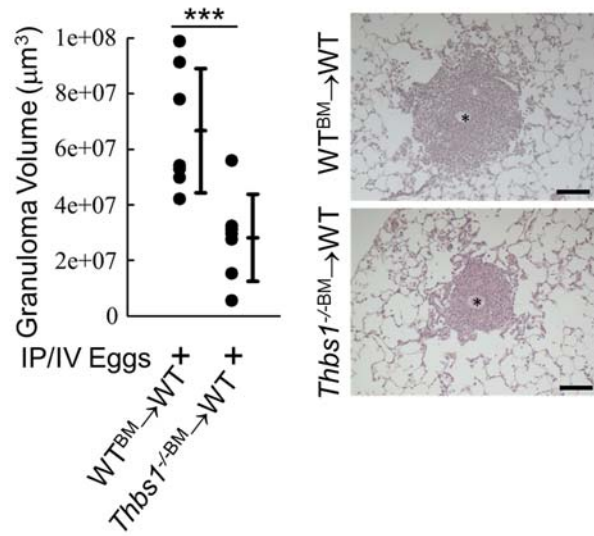

**Supplementary Figure 10. Granuloma volumes in *Thbs1*<sup>-/-</sup> bone marrow-deficient mice.** Wildtype (WT) recipients of wildtype or *Thbs1*<sup>-/-</sup> bone marrow, following IP/IV egg-exposure (n=7 mice / group; mean ± SD plotted; t test, \**P*<0.005, \*: vessel lumen; scale bars: 100µm). IP/IV=intraperitoneal and intravenous *S. mansoni* eggs.

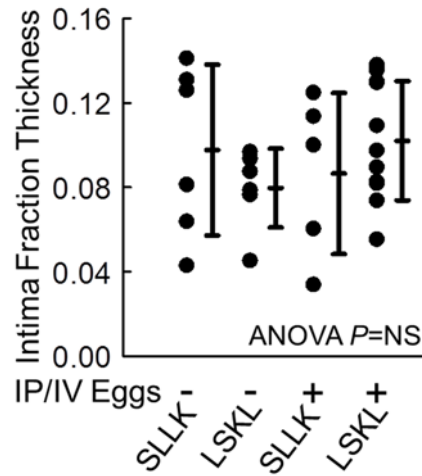

**Supplementary Figure 11. No change in the pulmonary vascular intima thickness in *Schistosoma*-exposed wildtype mice treated with either scrambled (SLLK) or LSKL peptide.** (n=6, 6, 5 and 11 mice / group, respectively; mean  $\pm$  SD plotted; ANOVA  $P=NS$ ). NS=non-significant, IP/IV=intraperitoneal and intravenous *S. mansoni* eggs.

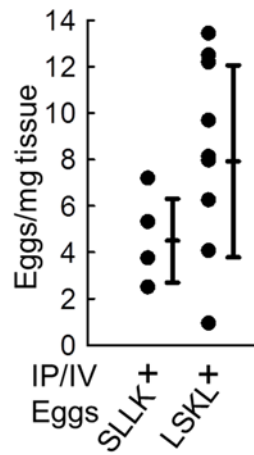

**Supplementary Figure 12. Egg burden 1 week after IV egg augmentation following TSP-1 blockade.** LSKL or SLLK treatment of wildtype mice, following IP/IV egg-exposure (N=5 and 10 mice / group; mean  $\pm$  SD plotted; t test,  $P=NS$ ). IP/IV=intraperitoneal and intravenous *S. mansoni* eggs.

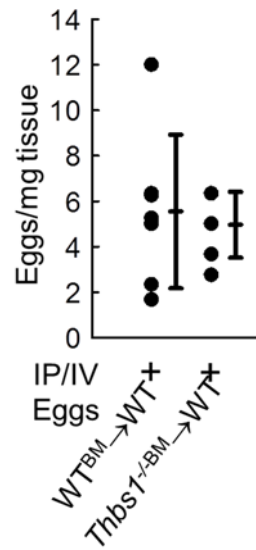

**Supplementary Figure 13. Egg burden 1 week after IV egg augmentation in *Thbs1*<sup>-/-</sup> bone marrow-deficient mice.** Wildtype (WT) recipients of wildtype or *Thbs1*<sup>-/-</sup> bone marrow, following IP/IV egg-exposure (N=7 and 6 mice/group, respectively; mean ± SD plotted; t test, *P*=NS). IP/IV=intraperitoneal and intravenous *S. mansoni* eggs.

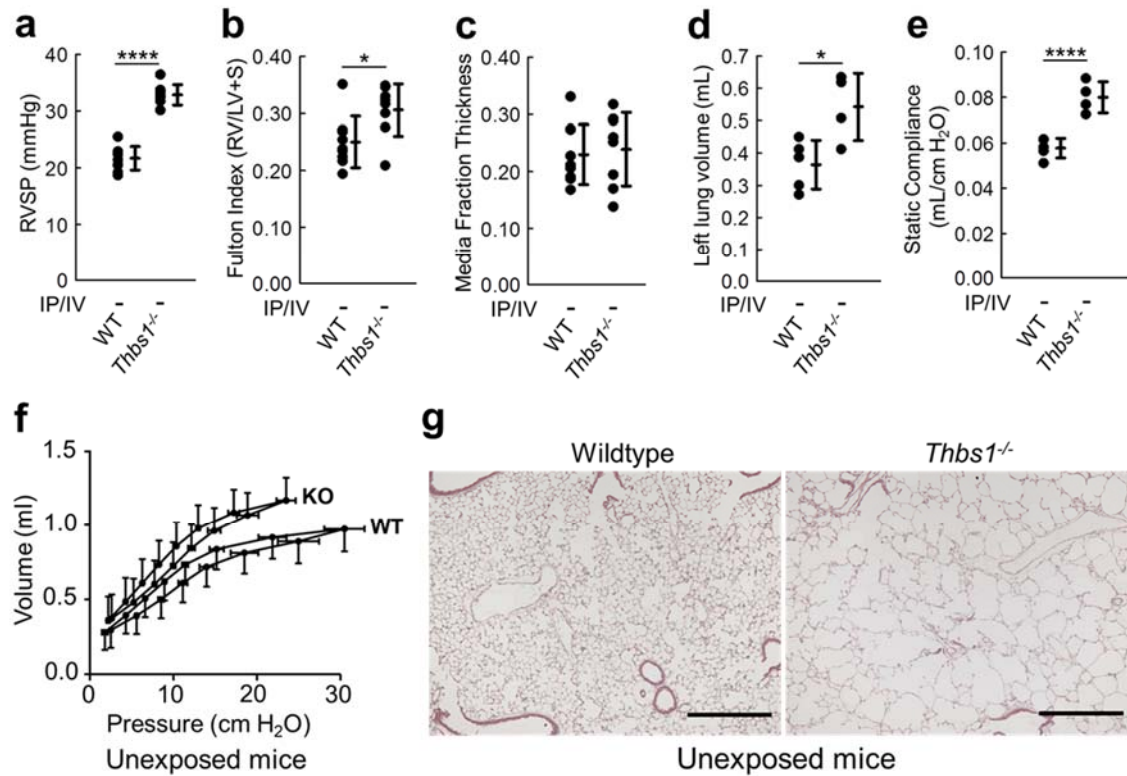

**Supplementary Figure 14: *Thbs1*<sup>-/-</sup> mice have at baseline higher right ventricular systolic pressure (RVSP) and emphysema.** IP/IV eggs unexposed *Thbs1*<sup>-/-</sup> mice showed higher baseline (a) RVSP (n=9 and 8 mice/group, respectively; mean ± SD plotted; t test, \*\*\*\**P*<0.001); (b) Fulton index (RV/(LV+S)) (n=9 and 8 mice/group, respectively; mean ± SD plotted; t test, \**P*<0.05); with no difference in (c) media thickness (n=9 and 8 mice/group, respectively; mean ± SD plotted; t-test *P*=NS). *Thbs1*<sup>-/-</sup> mice did have (d) larger left lung volumes (as measured by water displacement) (n= 5 and 5 mice/group, respectively; mean ± SD plotted; t test, \**P*<0.05), (e and f) increased static compliance by pulmonary function testing (n=4 mice / group; mean ± SD plotted; t test, \*\*\*\**P*<0.001 in e; mean ± SEM for pressures and volumes displayed on graph in f), and (g) emphysema on lung histology as compared to wildtype (WT) mice (representative image of n=5 / group; scale bar: 500 μm). IP/IV=intraperitoneal and intravenous *S. mansoni* eggs.

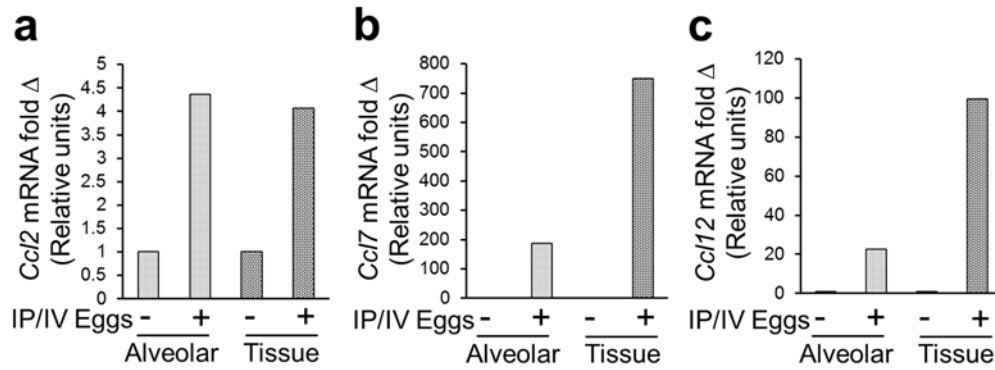

**Supplementary Figure 15. Evidence of higher expression of the CCR2 ligands CCL2, CCL7 and CCL12 in sorted tissue macrophages from *Schistosoma*-exposed mice.**

RNA-seq analysis of sorted tissue macrophages (CD45<sup>+</sup>F4/80<sup>+</sup>CD11b<sup>+</sup>SSC<sup>low</sup>) versus alveolar macrophages (CD45<sup>+</sup>F4/80<sup>+</sup>CD11c<sup>+</sup>SiglecF<sup>+</sup>) from IP/IV egg-exposed or unexposed wildtype mice to determine transcript quantities of (a) *Ccl2*, (b) *Ccl7*, and (c) *Ccl12* (pooled mRNA from 3 mice / group; normalized to alveolar unexposed = 1). IP/IV=intraperitoneal and intravenous *S. mansoni* eggs.

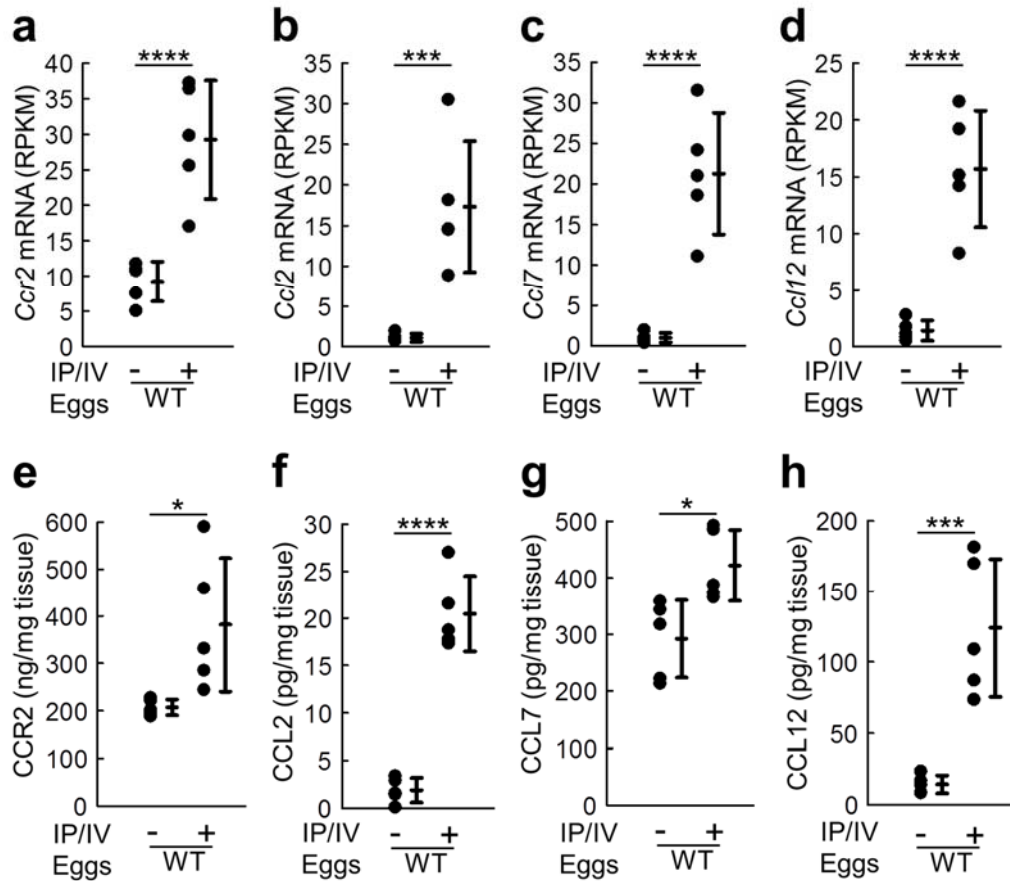

**Supplementary Figure 16. Evidence of higher expression of CCR2 (receptor on Ly6C<sup>+</sup> monocytes for recruitment) and its ligands in whole lung lysates of *Schistosoma* exposed wildtype mice.** RNA seq analysis for mRNA transcript quantity of (a) *Ccr2*, (b) *Ccl2*, (c) *Ccl7*, and (d) *Ccl12* and protein concentration of (e) CCR2, (f) CCL2, (g) CCL7, and (h) CCL12 in whole lung tissue of wildtype IP/IV egg-exposed and unexposed, (for each, n=5 samples/group; RPKM: reads per kilobase per million mapped reads; mean  $\pm$  SD plotted; t-test; \* $P$ <0.05, \*\*\* $P$ <0.005, \*\*\*\* $P$ <0.001). IP/IV=intraperitoneal and intravenous *S. mansoni* eggs.

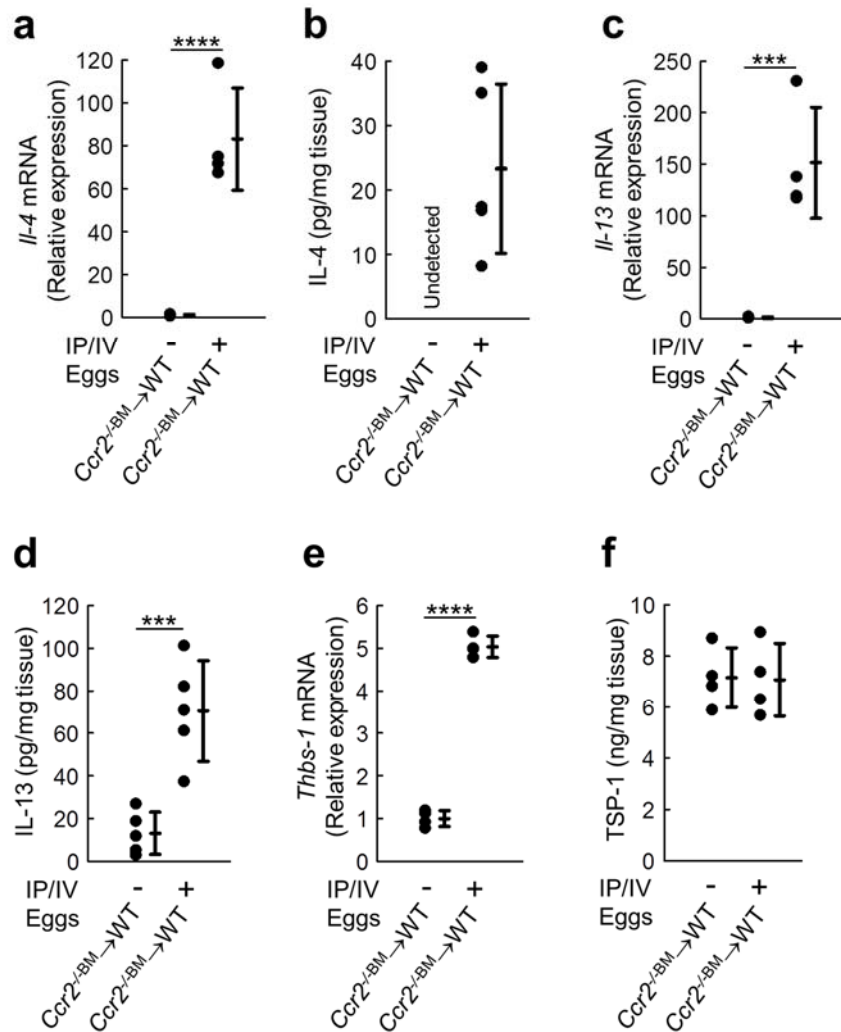

**Supplementary Figure 17. IL-4, IL-13 and TSP-1 levels are higher in *Schistosoma* exposed wildtype recipient of *Ccr2*<sup>-/-</sup> bone marrow (BM) cells.** mRNA and protein levels of (a&b) *Il4*/IL-4, (c&d) *Il13*/IL-13 and (e&f) *Thbs1*/TSP-1 in whole lung lysates of *Schistosoma* egg exposed and unexposed wildtype mice recipient of *Ccr2*<sup>-/-</sup> BM (n=4, 4; 5, 5; 4, 4; 5, 5; 4, 4; 4 and 4 /group, respectively; mean ± SD plotted; mRNA quantified by RT-PCR; 2<sup>-ΔCt</sup> relative to the geometric mean of β-actin housekeeping gene; normalized to mean of wildtype recipient of *Ccr2*<sup>-/-</sup> BM unexposed group = 1; t-tests shown, \*\*\**P*<0.005, \*\*\*\**P*<0.001). IP/IV=intraperitoneal and intravenous *S. mansoni* eggs.



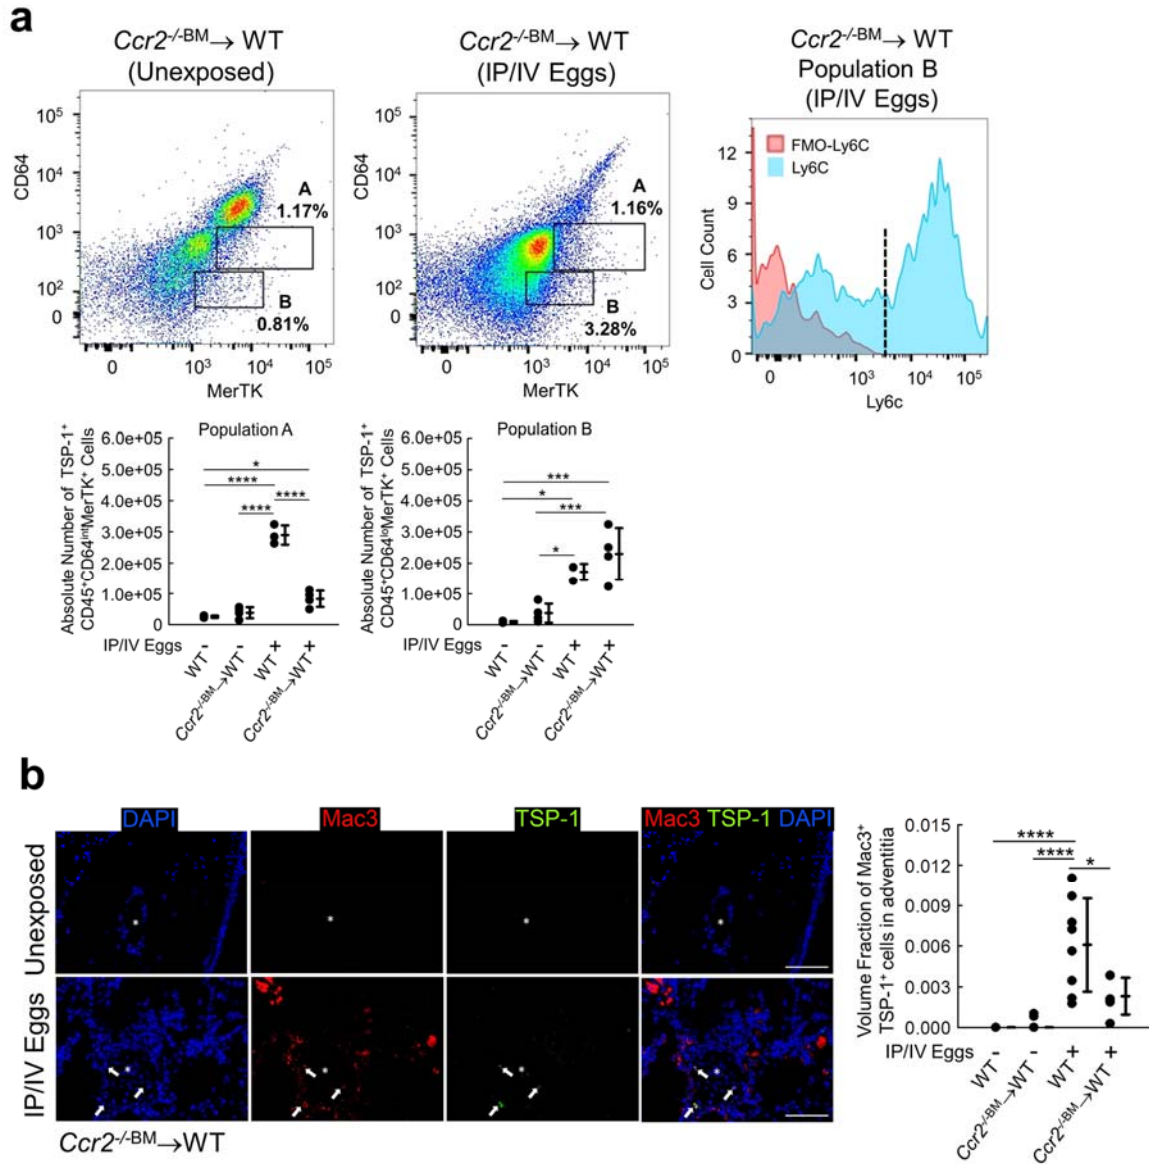

**Supplementary Figure 18. Evidence of less recruitment of Ly6C<sup>+</sup> cells in wildtype mice recipient of *Ccr2*<sup>-/-</sup> bone marrow (BM) cells and TSP-1<sup>+</sup>Mac3<sup>+</sup> co-localization.**

(a) Flow cytometry was performed on WT recipients of *Ccr2*<sup>-/-</sup> BM (as compared to the WT mouse data reproduced here from Figure 1c). Gating on the CD45<sup>+</sup>TSP-1<sup>+</sup> population (using the same gating strategy as in wildtype mice in Supplementary Fig. 2 above) in wildtype recipients of *Ccr2*<sup>-/-</sup> BM unexposed and *Schistosoma*-exposed indicates an increase in CD64<sup>lo</sup>MerTK<sup>+</sup>Ly6C<sup>+</sup> cells (population “B”), consistent with intravascular monocytes, but suppression of the CD64<sup>int</sup>MerTK<sup>+</sup> cells (population “A”) which are consistent with monocytes recruited into the parenchyma (n=3/group for WT and

n=4/group for WT recipients of *Ccr2*<sup>-/-</sup> BM). **(b)** Quantification of the volume fraction of TSP-1<sup>+</sup>Mac3<sup>+</sup> cells in the adventitia of vessels by stereology; colocalization data for *Schistosoma* exposed and exposed wildtype mice without BM transplantation and wildtype recipient of *Ccr2*<sup>-/-</sup> BM. The wildtype data without BM transplantation is same as shown in Figure 1E) (asterisk: vessel lumen; arrows: representative positive double-stained cells; scale bars: 100 μm; n=5, 6, 8 and 6 mice / group, respectively; mean ± SD plotted; ANOVA  $P<0.001$  with *post-hoc* Tukey tests shown; \* $P<0.05$ ; \*\*\* $P<0.005$ , \*\*\*\* $P<0.001$ ). IP/IV=intraperitoneal and intravenous *S. mansoni* eggs.

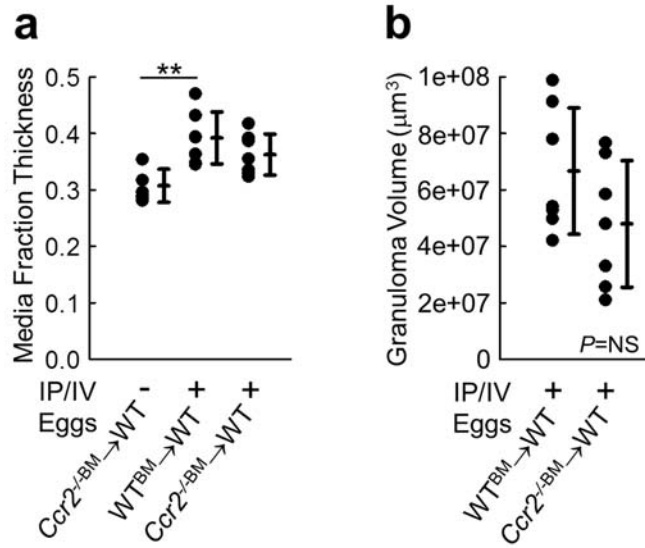

**Supplementary Figure 19: Mildly depressed media thickness, and no change in intima thickness or granuloma volumes between *Schistosoma* exposed wildtype mice recipient of *CCR2*<sup>-/-</sup> and wildtype bone marrow (BM) cells. (a) Media fractional thickness (n=5, 7, 7 and mice / group, respectively) and (b) peri-egg granuloma volumes (n=7 mice / group, respectively), in unexposed or IP/IV eggs-exposed wildtype recipients of *Ccr2*<sup>-/-</sup> BM mice compared to wildtype recipients of wildtype BM (mean ± SD plotted; ANOVA  $P=0.006$  with *post-hoc* Tukey tests shown,  $**P<0.01$ ). IP/IV=intraperitoneal and intravenous *S. mansoni* eggs. The WT<sup>BM</sup> → WT data is the same as in Figure 2b (media fractional thickness) and Supplementary Figure 10 (granuloma volumes).**

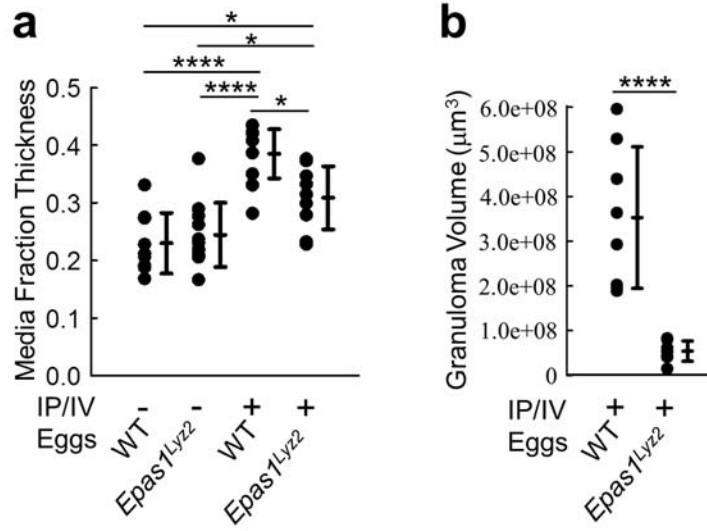

**Supplementary Figure 20. Less vascular remodeling and smaller granulomas in *Epas1<sup>fl/fl</sup>* x *Ly2z-Cre* mice following *Schistosoma* exposure. (a) Quantitative fractional thickness of the pulmonary vascular media of unexposed or *Schistosoma*-exposed wildtype (WT) and *Epas1<sup>fl/fl</sup>* x *Ly2z-Cre* mice (represented as *Epas1<sup>Ly2z</sup>*) (n=9, 11, 9 and 9 mice / group, respectively; mean ± SD plotted; ANOVA  $P < 0.001$ , with *post hoc* Tukey tests shown). (b) Peri-egg granuloma volumes of *Schistosoma*-exposed wildtype (WT) and *Epas1<sup>fl/fl</sup>* x *Ly2z-Cre* mice (n=8 mice/group; mean ± SD plotted; t test ;  $P$  values: \* $P < 0.05$ ; \*\*\*\* $P < 0.001$ ). IP/IV=intraperitoneal and intravenous *S. mansoni* eggs.**

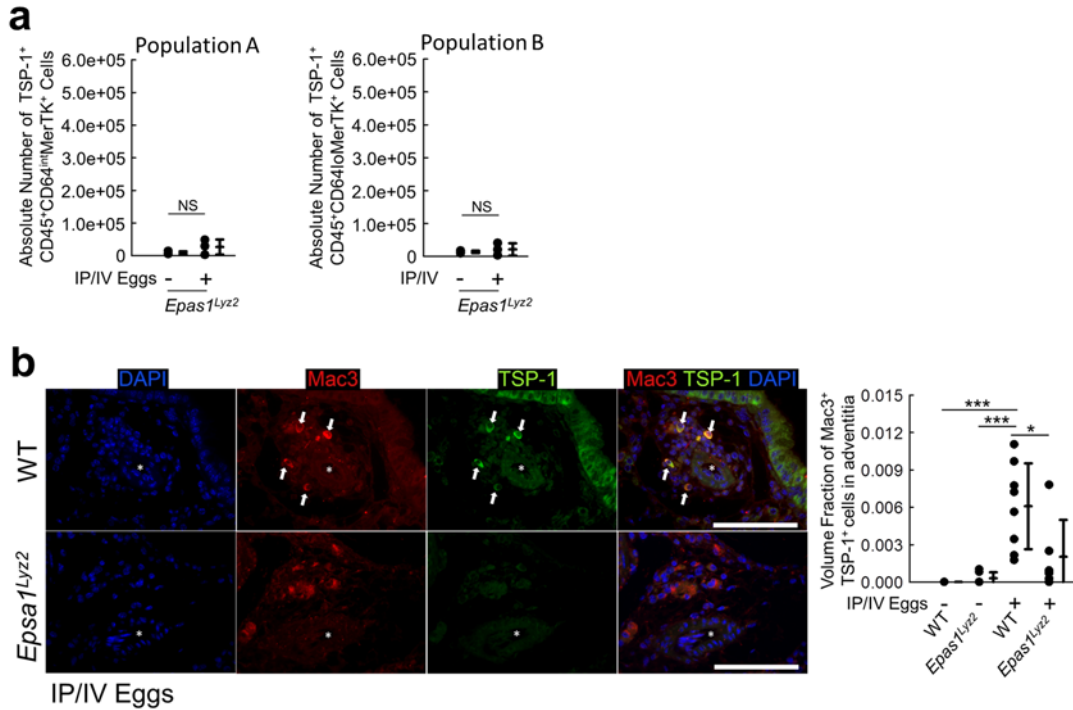

**Supplementary Figure 21. Evidence of Hif2 $\alpha$  regulation of TSP-1 in myeloid cells. (a)** Absolute numbers of the A and B populations from Figure 3c (N=3/group; mean  $\pm$  SD plotted; t-test) in *Schistosoma* exposed and unexposed *Epas1<sup>fl/fl</sup>*  $\times$  *Lyz2-Cre* mice. **(b)** Representative immunostaining for TSP-1 and Mac3 (macrophage marker), and quantification of the volume fraction of TSP-1<sup>+</sup>Mac3<sup>+</sup> cells in the adventitia of vessels by stereology; colocalization data for *Schistosoma* exposed and exposed wildtype mice and *Epas1<sup>fl/fl</sup>*  $\times$  *Lyz2-Cre* are same as shown in Figure 1E and Figure 3D, reproduced here for comparison between wildtype and the *Epas1<sup>fl/fl</sup>*  $\times$  *Lyz2-Cre* data (asterisk: vessel lumen; arrows: representative positive double-stained cells; scale bars: 100  $\mu$ m; n=5, 6, 8 and 6 mice/ group, respectively; ANOVA  $P < 0.001$  with *post-hoc* Tukey tests shown). (mean  $\pm$  SD plotted;  $P$  values: NS, non-significant; \* $P < 0.05$ ; \*\*\* $P < 0.005$ ). IP/IV=intraperitoneal and intravenous *S. mansoni* eggs.

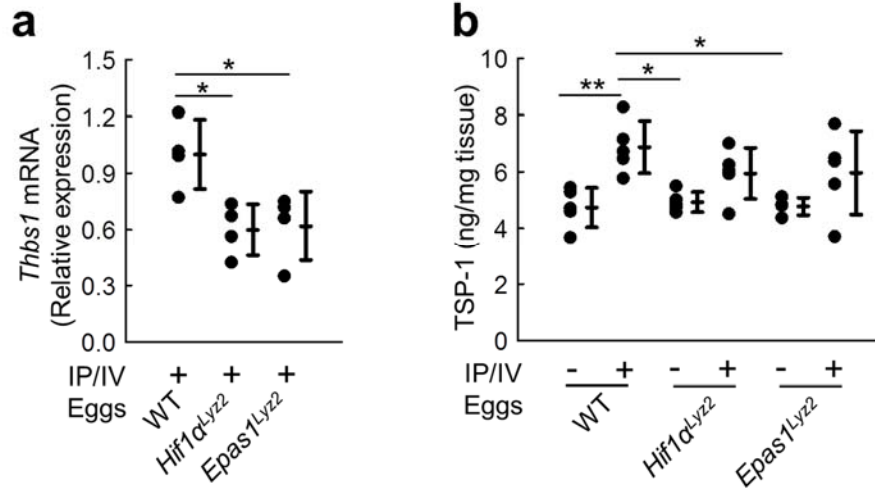

**Supplementary Figure 22. Evidence of both Hif1 $\alpha$  and Hif2 $\alpha$  regulation of TSP-1 in myeloid cells.** Whole lung (a) *Thbs1* mRNA by RT-PCR in *Schistosoma*-exposed (n=4/group) and (b) TSP-1 protein by ELISA in *Schistosoma*-exposed and unexposed wildtype, *Hif1 $\alpha$ <sup>fl/fl</sup>* x *Lyz2-Cre* and *Epas1<sup>fl/fl</sup>* x *Lyz2-Cre* mice (n= 5, 5, 5, 5, 4 and 5 mice / group, respectively). ( $2^{-\Delta\text{Ct}}$ ; relative to  $\beta$ -actin housekeeping gene; mean  $\pm$  SD plotted; ANOVA  $P=0.014$  with *post-hoc* Tukey tests shown, \* $P<0.05$ , \*\* $P<0.01$ ). IP/IV=intraperitoneal and intravenous *S. mansoni* eggs.

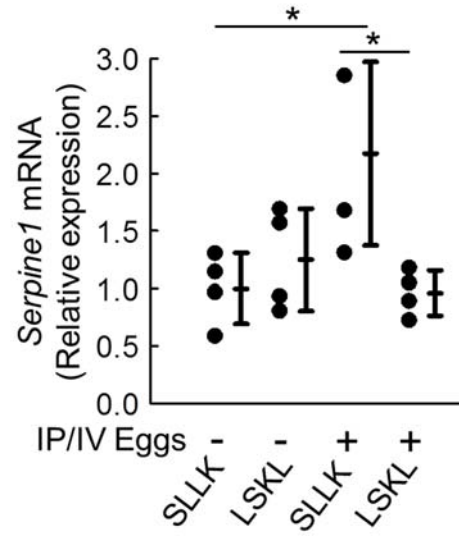

**Supplementary Figure 23:** LSKL treated mice showed significant reduction in TGF- $\beta$  target gene *Serpine1/Pai1* as measured by RT-PCR (n=4/group; mRNA quantified by RT-PCR;  $2^{-\Delta Ct}$  relative to the geometric mean of  $\beta$ -actin housekeeping gene; normalized to mean of wildtype SLLK treated unexposed group = 1; mean  $\pm$  SD plotted; ANOVA  $P < 0.015$  with *post-hoc* Tukey tests shown,  $*P < 0.05$ ). IP/IV=intraperitoneal and intravenous *S. mansoni* eggs.

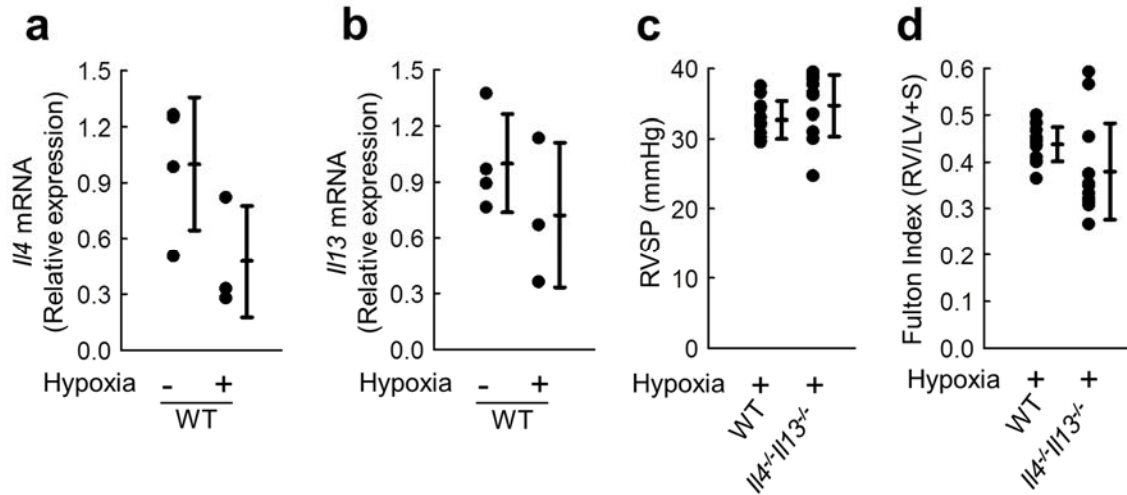

**Supplementary Figure 24. No evidence for a role for Type 2 inflammation in chronic hypoxia-induced PH.** (a-b) *Il4* and *Il13* mRNA quantity in normoxia or chronic hypoxia-exposed mice by RT-PCR (n=4 mice / group;  $2^{-\Delta Ct}$ ; relative to  $\beta$ -actin housekeeping gene; mean  $\pm$  SD plotted; t-test  $P=NS$  for both). (c-d) Right ventricular systolic pressure (RVSP) (n=13 and 12 mice / group, respectively), and Fulton index (n=13 and 12 mice/ group, respectively) in wildtype (WT) and *Il4<sup>-/-</sup>Il13<sup>-/-</sup>* mice exposed to chronic hypoxia (t-test,  $P=NS$ , non significant for both; mean  $\pm$  SD plotted).



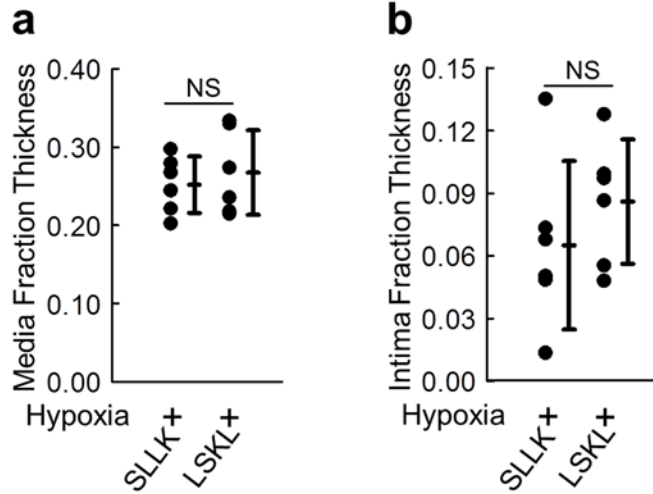

**Supplementary figure 25.** No change in pulmonary vascular media or intima remodeling in hypoxia exposed wildtype mice treated with either scrambled (SLLK) or LSKL peptide. (n=6 mice / group; t-test,  $P=NS$ , non significant for both; mean  $\pm$  SD plotted).

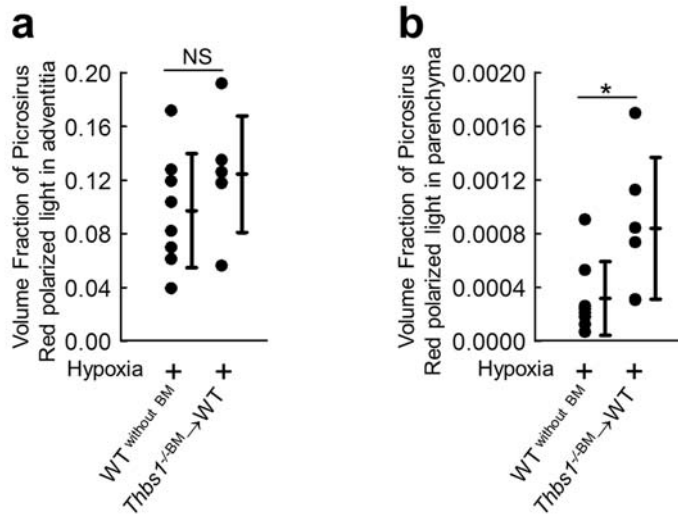

**Supplementary Figure 26. No evidence of perivascular fibrosis, but mild increase in parenchymal fibrosis in irradiated mice for by bone marrow (BM) transplant followed by hypoxa exposure.** Quantitative analysis using Picrosirius red staining showed no difference in the volume fraction of (a) vascular adventitia with (b) a partial upregulation in parenchyma, positive for Picrosirius red polarization between hypoxia exposed wildtype mice or wildtype mice receiving *Thbs1*<sup>-/-</sup> bone marrow (BM; n=8, 6; 8 and 8 mice /group, respectively; mean ± SD plotted; t-test, *P* value: NS, non-significant, \**P*<0.05).

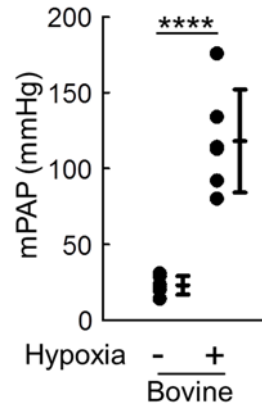

**Supplementary Figure 27. PH phenotype of newborn calves exposed to 2 weeks of hypoxia.** Higher mean pulmonary arterial pressure (mPAP) in 1 day-old male Holstein calves exposed to either normoxia control (Denver altitude;  $P_B = 640\text{mmHg}$ ) or hypobaric hypoxia ( $P_B = 445\text{mmHg}$ ) for 2 weeks. (n=6 animals per group; mean  $\pm$  SD plotted; t-test, \*\*\*\* $P < 0.001$ ).

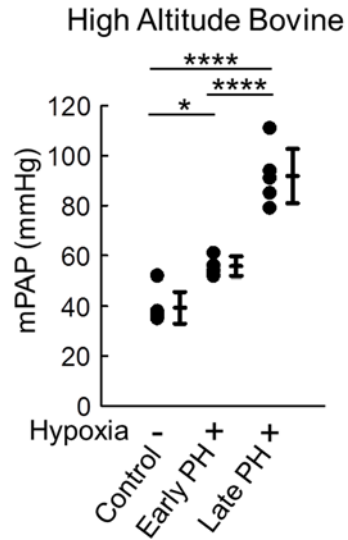

**Supplementary Figure 28. Phenotype of naturally occurring PH in adolescent calves at high altitude.** Higher mean pulmonary arterial pressure (mPAP) in calves that develop PH compared to non-PH calves at high altitude. The early PH animals are 6-8 months old calves and the late PH animals are 12-13 months old. All animals were born and raised at the same elevation (2200 meters; n=6, 4, and 6 animals / group, respectively; mean  $\pm$  SD plotted;  $P$  ANOVA $<$ 0.001; t-test, \* $P$  $<$ 0.05, \*\*\*\* $P$  $<$ 0.001).

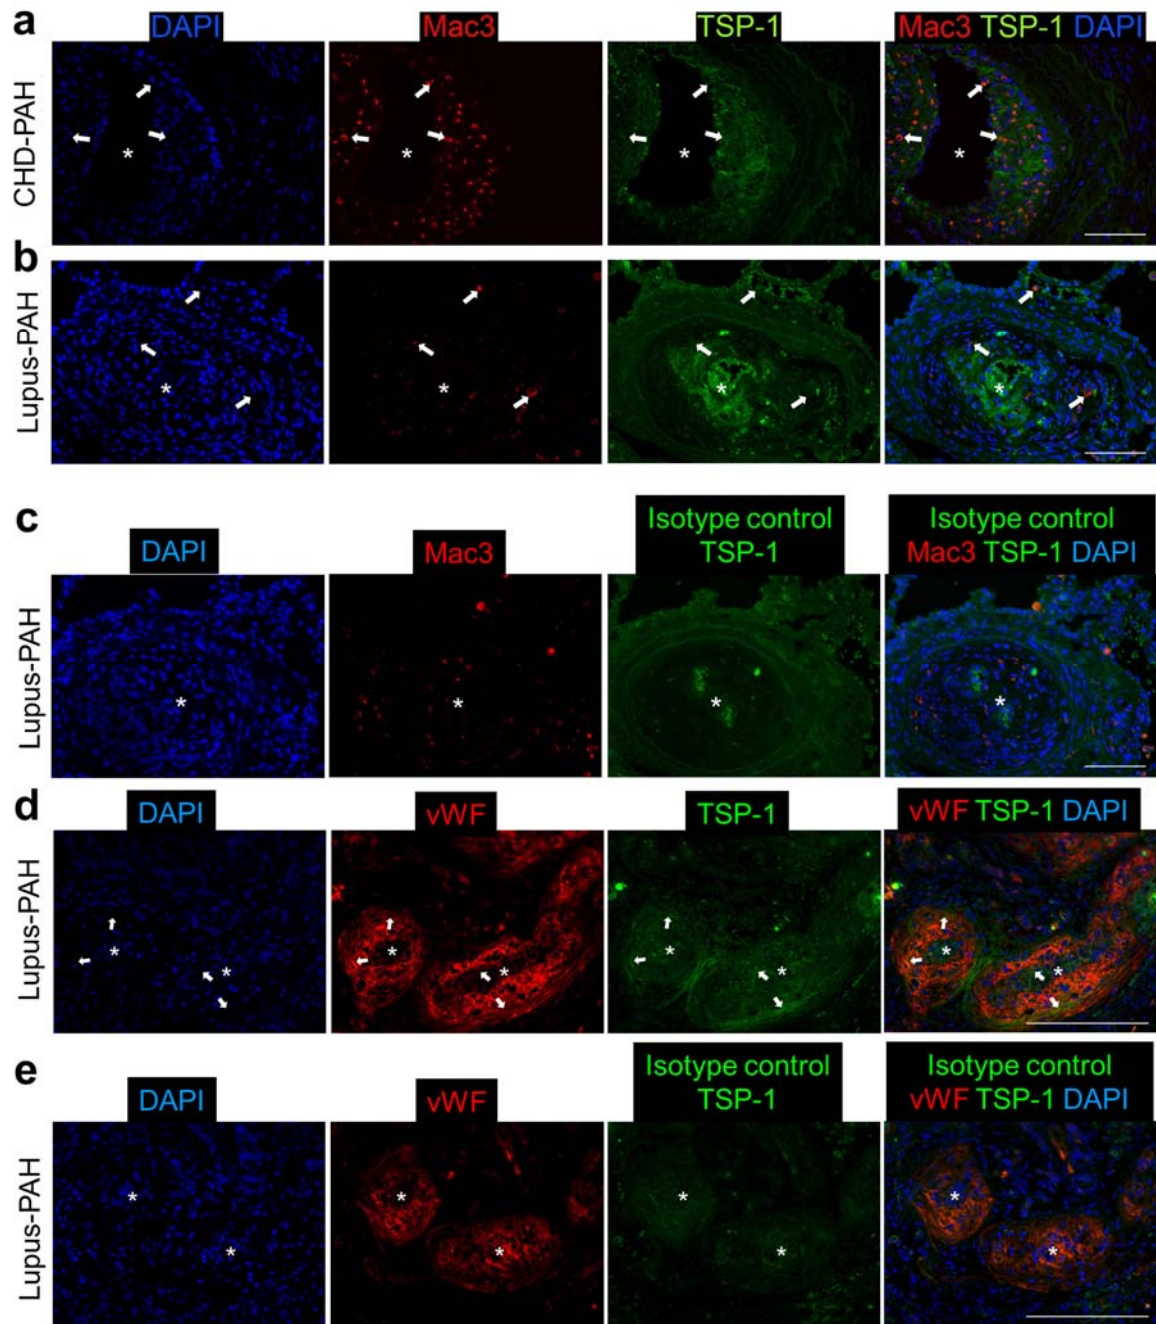

**Supplementary Figure 29. Immunostaining for TSP-1 in human explanted lung tissue identifies positive vascular signal in a case of lupus-associated PAH and a case of congenital heart disease-associated PAH.** The following samples were immunostained: PAH: 3 scleroderma-associated PAH, 2 lupus-associated PAH, and 1 rheumatoid arthritis-associated PAH; and Control: 2 failed lung donors, both with isolated

cerebral injury. Little TSP-1 immunostaining was observed in the 5 control samples, 3 scleroderma-associated PAH samples, 1 of the lupus-associated PAH samples, and 1 rheumatoid arthritis-associated PAH sample. **(a)** Co-staining for CD68 (macrophage marker) and TSP-1 in a congenital heart disease-associated PAH case (arrows show areas of TSP-1<sup>+</sup> staining). **(b)** Co-staining for CD68 and TSP-1 in a lupus-associated PAH case (arrows show areas of TSP-1<sup>+</sup> staining). **(c)** Co-staining for CD68 and an isotype-control for TSP-1 (rabbit IgG) in the same lupus-associated PAH case, from an adjacent section to the image shown in (b). **(d)** Co-staining for von Willebrand factor (vWF) and TSP-1 in lupus-associated PAH (arrows show areas of TSP-1<sup>+</sup> staining). **(e)** Co-staining for vWF and an isotype-control for TSP-1 (rabbit IgG) in lupus-associated PAH, from an adjacent section to the image shown in (d). (\*: vessel lumen; all scale bars 100µm.)

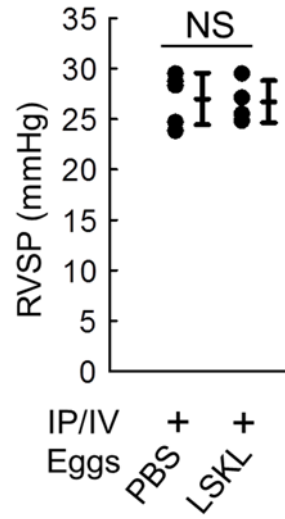

**Supplementary Figure 30. No difference in RVSP with a lose dose of LSKL (3mg/kg) treatment in *Schistosoma*-exposed wildtype mice.** (n=5 and 4 animals / group, respectively; mean  $\pm$  SD plotted; t test,  $P=NS$ , non significant). IP/IV=intraperitoneal and intravenous *S. mansoni* eggs.
